# Supplementary material for: PNO1 inhibits autophagy-mediated ferroptosis by GSH metabolic reprogramming in hepatocellular carcinoma
Source: Springer Nature journal article supplement (doi:10.1038/s41419-022-05448-7), 2022-11-29
Supplement: MOESM1 [file 41419_2022_5448_MOESM1_ESM.pdf]

Corresponding Author Name: Hua Guo, Xiaolin

Zhu and Qiang Wu

Manuscript Number: CDDIS-22-1842R

## Reporting Summary

*Springer Nature wishes to improve the reproducibility of the work that we publish. This checklist is used to ensure good reporting standards and to improve the reproducibility. Please respond completely to all questions relevant to your manuscript. For more information, please read the journal's Guide to Authors.*

☒ Check here to confirm that the following information is available in the Material & Methods section:

- **The exact sample size (*n*)** for each experimental group/condition, given as a number, not a range
- **A description of the sample collection** allowing the reader to understand whether the samples represent technical or biological replicates (including how many animals, litters, culture, etc.)
- **A statement of how many times the experiment shown was replicated in the laboratory**
- **Definitions of statistical methods and measures:** For small sample sizes ( $n < 5$ ) descriptive statistics are not appropriate, instead plot individual data points
  - Very common tests, such as *t*-test, simple  $\chi^2$  tests, Wilcoxon and Mann-Whitney tests, can be unambiguously identified by name only, but more complex techniques should be described in the methods section
  - Are tests one-sided or two-sided?
  - Are there adjustments for multiple comparisons?
  - **Statistical test results**, e.g., *P* values
  - Definition of '**center values**' as **median or mean**;
  - Definition of **error bars** as **s.d. or s.e.m. or c.i.**

*Please ensure that the answers to the following questions are reported in the manuscript itself. We encourage you to include a specific subsection in the methods section for statistics, reagents and animal models. Below, provide the page number or section and paragraph number.*

### Statistics and general methods

1. How was the sample size chosen to ensure adequate power to detect a pre-specified effect size? (Give section/paragraph or page #)

For animal studies, include a statement about sample size estimate even if no statistical methods were used.

2. Describe inclusion/exclusion criteria if samples or animals were excluded from the analysis. Were the criteria pre-established? (Give section/paragraph or page #)

3. If a method of randomization was used to determine how samples/animals were allocated to experimental groups and processed, describe it. (Give section/paragraph or page #)

For animal studies, include a statement about randomization even if no randomization was used.

### Reported in section/paragraph or page #

|                                                                                 |
|---------------------------------------------------------------------------------|
| No sample size calculation was performed.                                       |
| At least three independent experiments were performed.                          |
| No data were excluded from the analyses.                                        |
| The samples and cells were randomized into different groups prior to treatment. |
| For animal study, all the animals were randomly grouped for experiments.        |

|                                                                                                                                                                                      |                                                                                                                                                                                                               |
|--------------------------------------------------------------------------------------------------------------------------------------------------------------------------------------|---------------------------------------------------------------------------------------------------------------------------------------------------------------------------------------------------------------|
| 4. If the investigator was blinded to the group allocation during the experiment and/or when assessing the outcome, state the extent of blinding. (Give section/paragraph or page #) | The investigators were not blinded to group allocation during data collection and analysis, because the experimental design was complicated, the researchers were limited, and blinding feasibility was poor. |
| For animal studies, include a statement about blinding even if no blinding was done.                                                                                                 | In the vivo experiment, investigator was blinded to the group allocation.                                                                                                                                     |
| 5. For every figure, are statistical tests justified as appropriate?                                                                                                                 | Yes, the statistical tests justified as appropriate for every figure.                                                                                                                                         |
| Do the data meet the assumptions of the tests (e.g., normal distribution)?                                                                                                           | Yes, the data meet the assumptions of the tests.                                                                                                                                                              |
| Is there an estimate of variation within each group of data?                                                                                                                         | There was no estimate of variation with each group of data.                                                                                                                                                   |
| Is the variance similar between the groups that are being statistically compared? (Give section/paragraph or page #)                                                                 | The variance similar between the groups that are being statistically compared.                                                                                                                                |

## Reagents

|                                                                                                                                                      | Reported in section/paragraph or page #                                                                                                                                                                                                                                                                                   |
|------------------------------------------------------------------------------------------------------------------------------------------------------|---------------------------------------------------------------------------------------------------------------------------------------------------------------------------------------------------------------------------------------------------------------------------------------------------------------------------|
| 6. Report the source of antibodies (vendor and catalog number)                                                                                       | The following antibodies were used: anti-PNO1 was from Santa Cruz Biotechnology, anti-β-actin was from Cell Signaling Technology, anti-SLC7A11/Xc <sup>-</sup> from Proteintech, anti-GPX4 from Bioss antibodies; anti-LC3B (1:1,000), anti-SQSTM1/p62 (1:1000), from Cell Signaling Technology (Beverly, Massachusetts). |
| 7. Identify the source of cell lines and report if they were recently authenticated (e.g., by STR profiling) and tested for mycoplasma contamination | Hep3B and HLE cells were purchased from American Type Culture Collection (ATCC, Manassas, Virginia). And these cells were examined for authentication by short tandem                                                                                                                                                     |

## Animal Models

|                                                                                                                                                                    | Reported in section/paragraph or page #                                                                                                       |
|--------------------------------------------------------------------------------------------------------------------------------------------------------------------|-----------------------------------------------------------------------------------------------------------------------------------------------|
| 8. Report species, strain, sex and age of animals                                                                                                                  | Male BALB/c nude mice (4 weeks old).                                                                                                          |
| 9. For experiments involving live vertebrates, include a statement of compliance with ethical regulations and identify the committee(s) approving the experiments. | This study was consistent with Stamp of The Animal Ethical and Welfare Committee of Tianjin Medical University Cancer Institute and Hospital. |

10. We recommend consulting the ARRIVE guidelines ([PLoS Biol. 8\(6\), e1000412,2010](https://doi.org/10.1371/journal.plosbio.1000412)) to ensure that other relevant aspects of animal studies are adequately reported.

## Human subjects

### Reported in section/paragraph or page #

- |                                                                                                                                   |     |
|-----------------------------------------------------------------------------------------------------------------------------------|-----|
| 11. Identify the committee(s) approving the study protocol.                                                                       | N/A |
| 12. Include a statement confirming that informed consent was obtained from all subjects.                                          | N/A |
| 13. For publication of patient photos, include a statement confirming that consent to publish was obtained.                       | N/A |
| 14. Report the clinical trial registration number (at <a href="https://clinicaltrials.gov">ClinicalTrials.gov</a> or equivalent). | N/A |
15. For phase II and III randomized controlled trials, please refer to the [CONSORT statement](#) and submit the CONSORT checklist with your submission.
16. For tumor marker prognostic studies, we recommend that you follow the [REMARK reporting guidelines](#).

## Data deposition

### Reported in section/paragraph or page #

- |                                                                                                                                                                                                                                                        |     |
|--------------------------------------------------------------------------------------------------------------------------------------------------------------------------------------------------------------------------------------------------------|-----|
| 17. Provide accession codes for deposited data.<br>Data deposition in a public repository is mandatory for:<br>a. Protein, DNA and RNA sequences<br>b. Macromolecular structures<br>c. Crystallographic data for small molecules<br>d. Microarray data | N/A |
|--------------------------------------------------------------------------------------------------------------------------------------------------------------------------------------------------------------------------------------------------------|-----|

Deposition is strongly recommended for many other datasets for which structured public repositories exist; more details on our data policy are available in the Guide to Authors. We encourage the provision of other source data in supplementary information or in unstructured repositories such as [Figshare](#) and [Dryad](#). We encourage publication of Data Descriptors (see [Scientific Data](#)) to maximize data reuse.

- |                                                                                                                                                                                                                                                                                                                   |     |
|-------------------------------------------------------------------------------------------------------------------------------------------------------------------------------------------------------------------------------------------------------------------------------------------------------------------|-----|
| 18. If computer code was used to generate results that are central to the paper's conclusions, include a statement in the Methods section under " <b>Code availability</b> " to indicate whether and how the code can be accessed. Include version information as necessary and any restrictions on availability. | n/a |
|-------------------------------------------------------------------------------------------------------------------------------------------------------------------------------------------------------------------------------------------------------------------------------------------------------------------|-----|
